# Supplementary material for: A turn-on fluorescent sensor for Hg2+ detection based on graphene oxide and DNA aptamers
Source: Royal Society of Chemistry journal article supplement (doi:10.1039/c8nj01709c), 2018-01-01
Supplement: c8nj01709c1.pdf [file c8nj01709c1.pdf]

## Supporting Information

### **A turn-on fluorescent sensor for Hg<sup>2+</sup> detection based on graphene oxide and DNA aptamers**

Huan Guo <sup>a</sup>, Jingshuai Li <sup>a</sup>, Yuewen Li <sup>b</sup>, Dan Wu <sup>a</sup>, Hongmin Ma <sup>a</sup>, Qin  
Wei <sup>a</sup>, Bin Du <sup>a,\*</sup>

<sup>a</sup> Key Laboratory of Interfacial Reaction & Sensing Analysis in  
Universities of Shandong, School of Chemistry and Chemical  
Engineering, University of Jinan, Jinan 250022, P.R. China

<sup>b</sup> School of Resources and Environment, University of Jinan, Jinan  
250022, P.R. China

#### **\* Corresponding author**

Tel: +86 531 8276 7370

Fax: +86 531 8276 7370

E-mail: [dubin61@gmail.com](mailto:dubin61@gmail.com) (B. Du)

## Supplementary sections

Table 1 Determination and recovery tests of  $\text{Hg}^{2+}$  in real samples by our sensor.

| Real samples | Added $\text{Hg}^{2+}$ (nM) | Measured $\text{Hg}^{2+}$ (nM) |       |                    | Recovery (%) | RSD (n = 5, %) |
|--------------|-----------------------------|--------------------------------|-------|--------------------|--------------|----------------|
|              |                             | This method                    | AFS   | Relative error (%) |              |                |
| 1            | 0                           | 3.60                           | 3.65  | 1.37               |              |                |
| 2            | 10                          | 10.34                          | 10.68 | 3.18               | 100.52       | 1.02           |
| 3            | 20                          | 20.34                          | 19.96 | 1.90               | 100.26       | 0.89           |
| 4            | 30                          | 30.31                          | 30.83 | 1.69               | 100.07       | 1.15           |

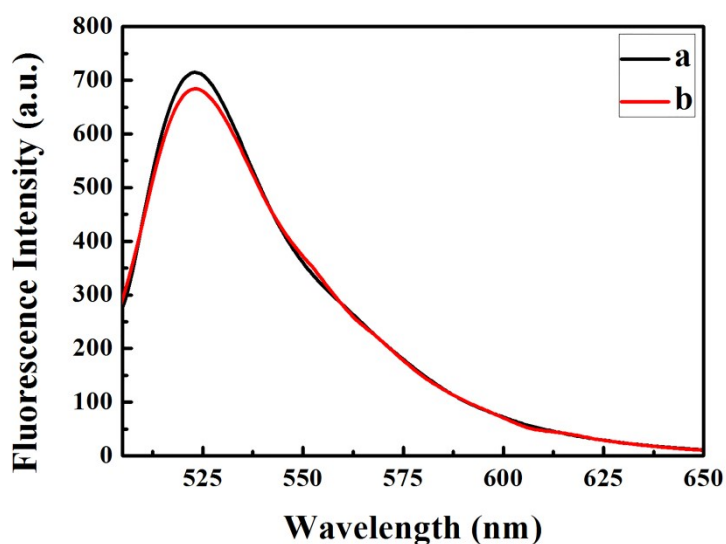

Fig. 1. Fluorescence emission spectra of AO. Conditions: The two reaction solutions were identical, which contain 1  $\mu\text{M}$  AO, 50  $\mu\text{g/mL}$  GO, 1  $\mu\text{M}$  P2, 1  $\mu\text{M}$  H-G4 and 0.05  $\mu\text{M}$   $\text{Hg}^{2+}$ . And curve a was obtained by measuring the supernate of final reaction solution; curve b was obtained after shaking well the final reaction solution.

We can see that the fluorescence intensity of curve a recovered more obviously compared with that of curve b. These results suggest that the removing of GO can raise the fluorescence recovering efficiency, indicating the improvement of sensitivity of our sensor. And in this work, the fluorescence emission spectra of detecting  $\text{Hg}^{2+}$

were all obtained by measuring the supernate of final reaction solution.

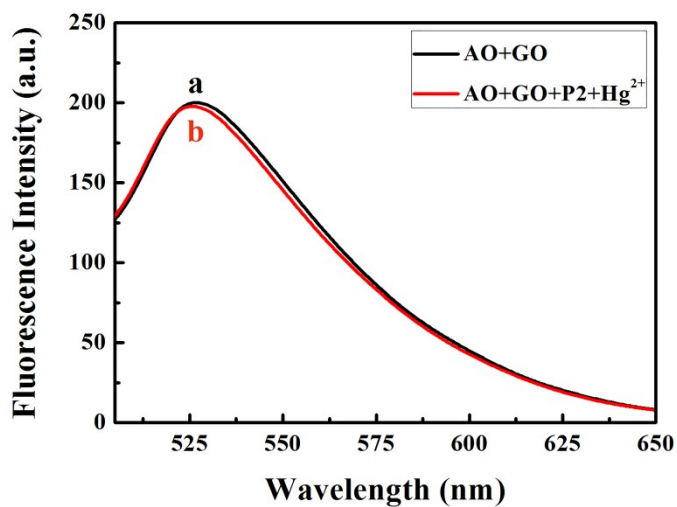

Fig. 2. Fluorescence emission spectra of AO. (a) 1  $\mu\text{M}$  AO + 50  $\mu\text{g/mL}$  GO; (b) 1  $\mu\text{M}$  AO + 50  $\mu\text{g/mL}$  GO + 1  $\mu\text{M}$  P2 + 0.05  $\mu\text{M}$  Hg<sup>2+</sup>.

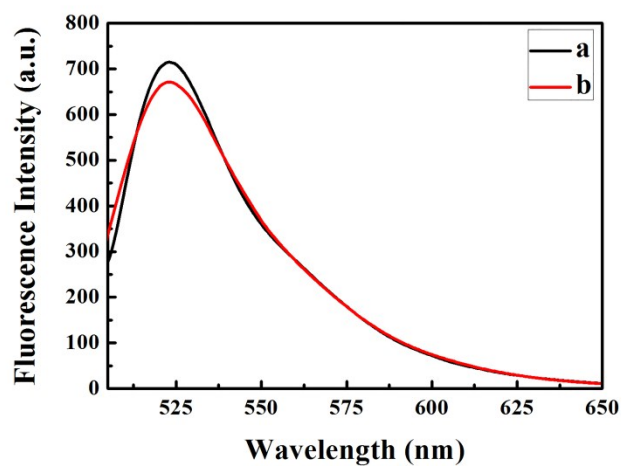

Fig. 3. Fluorescence emission spectra of AO. (a) 1  $\mu\text{M}$  AO + 50  $\mu\text{g/mL}$  GO + 1  $\mu\text{M}$  P2 + 1  $\mu\text{M}$  H-G4 + 0.05  $\mu\text{M}$  Hg<sup>2+</sup>; (b) 1  $\mu\text{M}$  AO + 60  $\mu\text{g/mL}$  GO + 1  $\mu\text{M}$  P2 + 1  $\mu\text{M}$  H-G4 + 0.05  $\mu\text{M}$  Hg<sup>2+</sup>.
